# Supplementary material for: High nerve density in breast cancer is associated with poor patient outcome
Source: PubMed Central journal article supplement — FASEB Bioadv. 2022 Mar 3;4(6):391–401. doi: 10.1096/fba.2021-00147 (PMC9164247; doi:10.1096/fba.2021-00147), 2022-03-03
Supplement: FBA2-4-391-s001.pdf [file FBA2-4-391-s001.pdf]

**Supplementary Table 1. The relationship between the presence of nerve fibres and/or trunks and clinicopathological parameters in breast cancer**

| Parameter                                 | Nerve - (n=19) | Nerve+ (n=107) | P-value <sup>a</sup> |
|-------------------------------------------|----------------|----------------|----------------------|
| <b>Tumor size<sup>b</sup></b>             |                |                | 0.7279               |
| 1 (n=56)                                  | 8 (14.3%)      | 48 (85.7%)     |                      |
| 2 (n=61)                                  | 10 (16.4%)     | 51 (83.6%)     |                      |
| 3 (n=4)                                   | 1(25.0%)       | 3 (75.0%)      |                      |
| 4 (n=5)                                   | 0 (0.0%)       | 5(100.0%)      |                      |
| <b>Patient age<sup>c</sup></b>            |                |                | 0.8619               |
| ≤50 (n=64)                                | 10 (15.6%)     | 54 (84.4%)     |                      |
| >50 (n=62)                                | 9 (14.5%)      | 53 (85.5%)     |                      |
| <b>Lymph node involvement<sup>d</sup></b> |                |                | 0.2551               |
| 0 (n=71)                                  | 11 (15.5%)     | 60 (84.5%)     |                      |
| 1 (n=31)                                  | 7 (22.6%)      | 24 (77.4%)     |                      |
| 2 (n=10)                                  | 1 (10.0%)      | 9 (90.0%)      |                      |
| 3 (n=14)                                  | 0 (0.0%)       | 14 (100.0%)    |                      |
| <b>HER2<sup>e</sup></b>                   |                |                | 0.3384               |
| HER2 - (n =91)                            | 12 (13.2%)     | 79 (86.8%)     |                      |
| HER2 + (n=35)                             | 7 (20.0%)      | 28 (80.0%)     |                      |
| <b>ER<sup>e</sup></b>                     |                |                | 0.0789               |
| ER - (n =44)                              | 10 (22.7%)     | 34 (77.3%)     |                      |
| ER + (n =82)                              | 9 (11.0%)      | 73 (89.0%)     |                      |
| <b>PR<sup>e</sup></b>                     |                |                | 0.2290               |
| PR - (n =57)                              | 11 (19.3%)     | 46 (80.7%)     |                      |
| PR + (n =69)                              | 8 (11.6%)      | 61 (88.4%)     |                      |
| <b>Molecular subtype<sup>f</sup></b>      |                |                | 0.3949               |
| Luminal A (n =69)                         | 7 (10.1%)      | 62 (89.9%)     |                      |
| Luminal B (n =15)                         | 3 (20.0%)      | 12 (80.0%)     |                      |
| HER-2 positive (n =20)                    | 4 (20.0%)      | 16 (80.0%)     |                      |
| Triple negative (n =22)                   | 5 (22.7%)      | 17 (77.3%)     |                      |
| <b>Pathological subtype<sup>g</sup></b>   |                |                | 0.3645               |
| IDC (n =116)                              | 16 (13.8%)     | 100 (86.2%)    |                      |
| ILC (n =6)                                | 2 (33.3%)      | 4 (66.7%)      |                      |
| Others (n=4)                              | 1 (25.0%)      | 3 (75.0%)      |                      |
| <b>Menopause</b>                          |                |                | 0.1943               |
| Pre-menopause (n =69)                     | 13(18.8%)      | 56 (81.2%)     |                      |
| Post-menopause (n =57)                    | 6 (10.5%)      | 51 (89.5%)     |                      |
| <b>The age of menarche<sup>h</sup></b>    |                |                | <b>0.0441</b>        |
| ≤15 (n =73)                               | 15 (20.5%)     | 58 (79.5%)     |                      |
| >15 (n =53)                               | 4 (7.5%)       | 49 (92.5%)     |                      |

<sup>a</sup>Chi-squared test, a P value ≤ 0.05 was considered statistically significant.

<sup>b</sup>Tumor sizes were scored according to the TNM staging system.

<sup>c</sup>Patients were arbitrarily divide into two groups according to the median age at diagnosis age 50.

<sup>d</sup>Lymph node involvement was scored according to the TNM staging system.

<sup>e</sup>HER2, ER and PR positivity defined using immunohistochemistry was recorded in the pathology report of the surgically removed breast cancer tissues

<sup>f</sup>Molecular subtypes were defined as luminal A: ER+ and/or PR+/HER2-; luminal B: ER+ and/or PR+/HER2+; HER2+; TNBC: ER-/PR-/HER2-.

<sup>g</sup>IDC: Invasive ductal carcinomas; ILC: Invasive lobular carcinomas; Others including micropapillary carcinomas, metaplastic carcinomas and mucinous adenocarcinomas.

<sup>h</sup>Patients were arbitrarily divided into two groups according to the median age of menarche age 15.

**Supplementary Table 2. The relationship between the presence of nerve fibres and clinicopathological parameters in breast cancer**

| Parameter                                 | Nerve fibre negative<br>(n=28) | Nerve fibre positive<br>(n=98) | P-value <sup>a</sup> |
|-------------------------------------------|--------------------------------|--------------------------------|----------------------|
| <b>Tumor size<sup>b</sup></b>             |                                |                                | 0.3511               |
| 1 (n=56)                                  | 13 (23.2%)                     | 43 (76.8%)                     |                      |
| 2 (n=61)                                  | 13 (21.3%)                     | 48 (78.7%)                     |                      |
| 3 (n=4)                                   | 2 (50.0%)                      | 2 (50.0%)                      |                      |
| 4 (n=5)                                   | 0 (0.0%)                       | 5 (100.0%)                     |                      |
| <b>Patient age<sup>c</sup></b>            |                                |                                | 0.9241               |
| ≤50 (n=64)                                | 14 (21.9%)                     | 50 (78.1%)                     |                      |
| >50 (n=62)                                | 14 (22.6%)                     | 48 (77.4%)                     |                      |
| <b>Lymph node involvement<sup>d</sup></b> |                                |                                | 0.3006               |
| 0 (n=71)                                  | 17 (23.9%)                     | 54 (76.1%)                     |                      |
| 1 (n=31)                                  | 9 (29.0%)                      | 22 (71.0%)                     |                      |
| 2 (n=10)                                  | 1 (10.0%)                      | 9 (90.0%)                      |                      |
| 3 (n=14)                                  | 1 (7.1%)                       | 13 (92.9%)                     |                      |
| <b>HER2<sup>e</sup></b>                   |                                |                                | 0.2877               |
| HER2- (n =91)                             | 18 (19.8%)                     | 73 (80.2%)                     |                      |
| HER2+ (n=35)                              | 10 (28.6%)                     | 25 (71.4%)                     |                      |
| <b>ER<sup>e</sup></b>                     |                                |                                | 0.0577               |
| ER- (n =44)                               | 14 (31.8%)                     | 30 (68.2%)                     |                      |
| ER+ (n =82)                               | 14 (17.1%)                     | 68 (82.9%)                     |                      |
| <b>PR<sup>e</sup></b>                     |                                |                                | 0.1513               |
| PR- (n =57)                               | 16 (28.1%)                     | 41 (71.9%)                     |                      |
| PR+ (n =69)                               | 12 (17.4%)                     | 57 (82.6%)                     |                      |
| <b>Molecular subtype<sup>f</sup></b>      |                                |                                | 0.1073               |
| Luminal A (n =69)                         | 10 (14.5%)                     | 59 (85.5%)                     |                      |
| Luminal B (n =15)                         | 5 (33.3%)                      | 10 (66.7%)                     |                      |
| HER-2 positive (n =20)                    | 5 (25.0%)                      | 15 (75.0%)                     |                      |
| TNBC (n =22)                              | 8 (36.4%)                      | 14 (63.6%)                     |                      |
| <b>Pathological subtype<sup>g</sup></b>   |                                |                                | 0.2400               |
| IDC (n =116)                              | 24 (20.7%)                     | 92 (79.3%)                     |                      |
| ILC (n =6)                                | 3 (50.0%)                      | 3 (50.0%)                      |                      |
| Others (n=4)                              | 1 (25.0%)                      | 3 (75.0%)                      |                      |
| <b>Menstruation</b>                       |                                |                                | 0.2509               |
| Pre-menopause (n =69)                     | 18 (26.1%)                     | 51 (73.9%)                     |                      |
| Post-menopause (n=57)                     | 10 (17.5%)                     | 47 (82.5%)                     |                      |
| <b>Age of menarche<sup>h</sup></b>        |                                |                                | 0.2279               |
| ≤15 (n =73)                               | 19 (26.0%)                     | 54 (74.0%)                     |                      |
| >15 (n =53)                               | 9 (17.0%)                      | 44 (83.0%)                     |                      |

<sup>a</sup>Chi-squared test, a *P* value ≤ 0.05 was considered statistically significant.

<sup>b</sup>Tumor sizes were scored according to the TNM staging system.

<sup>c</sup>Patients were arbitrarily divide into two groups according to the median age at diagnosis age 50.

<sup>d</sup>Lymph node involvement was scored according to the TNM staging system.

<sup>e</sup>HER2, ER and PR positivity defined using immunohistochemistry was recorded in the pathology report of the surgically removed breast cancer tissues

<sup>f</sup>Molecular subtypes were defined as luminal A: ER+ and/or PR+/HER2-; luminal B: ER+ and/or PR+/HER2+; HER2+; TNBC: ER-/PR-/HER2-.

<sup>g</sup>IDC: Invasive ductal carcinomas; ILC: Invasive lobular carcinomas; Others including micropapillary carcinomas, metaplastic carcinomas and mucinous adenocarcinomas.

<sup>h</sup>Patients were arbitrarily divided into two groups according to the median age of menarche age 15.

**Supplementary Table 3. The relationship between the density of nerve fibres and clinicopathological parameters in breast cancer (the median nerve fibre count as the cut-off)**

| Parameter                                 | Nerve fibre counts <8<br>(n=62) | Nerve fibre<br>counts ≥8 (n=64) | P-value <sup>a</sup> |
|-------------------------------------------|---------------------------------|---------------------------------|----------------------|
| <b>Tumor size<sup>b</sup></b>             |                                 |                                 | 0.5207               |
| 1 (n=56)                                  | 30 (53.6%)                      | 26 (46.4%)                      |                      |
| 2 (n=61)                                  | 27 (44.3%)                      | 34 (55.7%)                      |                      |
| 3 (n=4)                                   | 3 (75.0%)                       | 1 (25.0%)                       |                      |
| 4 (n=5)                                   | 2 (40.0%)                       | 3 (60.0%)                       |                      |
| <b>Patient age<sup>c</sup></b>            |                                 |                                 | 0.8563               |
| ≤50 (n=64)                                | 32 (50.0%)                      | 32 (50.0%)                      |                      |
| >50 (n=62)                                | 30 (48.4%)                      | 32 (51.6%)                      |                      |
| <b>Lymph node involvement<sup>d</sup></b> |                                 |                                 | 0.1292               |
| 0 (n=71)                                  | 39 (54.9%)                      | 32 (45.1%)                      |                      |
| 1 (n=31)                                  | 16 (51.6%)                      | 15 (48.4%)                      |                      |
| 2 (n=10)                                  | 4 (40.0%)                       | 6 (60.0%)                       |                      |
| 3 (n=14)                                  | 3 (21.4 %)                      | 11 (78.6%)                      |                      |
| <b>HER2<sup>e</sup></b>                   |                                 |                                 | 0.2691               |
| HER2 - (n =91)                            | 42 (46.2%)                      | 49 (53.8%)                      |                      |
| HER2 + (n=35)                             | 20 (57.1%)                      | 15 (42.9%)                      |                      |
| <b>ER<sup>e</sup></b>                     |                                 |                                 | <b>0.0176</b>        |
| ER - (n =44)                              | 28 (63.6%)                      | 16 (36.4%)                      |                      |
| ER + (n =82)                              | 34 (41.5%)                      | 48 (58.5%)                      |                      |
| <b>PR<sup>e</sup></b>                     |                                 |                                 | 0.0762               |
| PR - (n =57)                              | 33 (57.9%)                      | 24 (42.1%)                      |                      |
| PR + (n =69)                              | 29 (42.0%)                      | 40 (58.0%)                      |                      |
| <b>Molecular subtype<sup>f</sup></b>      |                                 |                                 | 0.1155               |
| Luminal A (n =69)                         | 28 (40.6%)                      | 41 (59.4%)                      |                      |
| Luminal B (n =15)                         | 7 (46.7%)                       | 8 (53.3%)                       |                      |
| HER-2 positive (n =20)                    | 13 (65.0%)                      | 7 (35.0%)                       |                      |
| Triple negative (n =22)                   | 14 (63.6%)                      | 8 (36.4%)                       |                      |
| <b>Pathological subtype<sup>g</sup></b>   |                                 |                                 | 0.9986               |
| IDC (n =116)                              | 57 (49.1%)                      | 59 (50.9%)                      |                      |
| ILC (n =6)                                | 3 (50.0%)                       | 3 (50.0%)                       |                      |
| Others (n=4)                              | 2 (50.0%)                       | 2 (50.0%)                       |                      |
| <b>Menstruation</b>                       |                                 |                                 | 0.1473               |
| Pre-menopause (n =69)                     | 38 (55.1%)                      | 31 (44.9%)                      |                      |
| Post-menopause (n =57)                    | 24 (42.1%)                      | 33 (57.9%)                      |                      |
| <b>Age of menarche<sup>h</sup></b>        |                                 |                                 | <b>0.0282</b>        |
| ≤15 (n =73)                               | 42 (57.5%)                      | 31 (42.5%)                      |                      |
| >15 (n =53)                               | 20 (37.7%)                      | 33 (62.3%)                      |                      |

<sup>a</sup>Chi-squared test, a *P* value ≤ 0.05 was considered statistically significant.

<sup>b</sup>Tumor sizes were scored according to the TNM staging system.

<sup>c</sup>Patients were arbitrarily divide into two groups according to the median age at diagnosis age 50.

<sup>d</sup>Lymph node involvement was scored according to the TNM staging system.

<sup>e</sup>HER2, ER and PR positivity defined using immunohistochemistry was recorded in the pathological report of surgically removed breast cancer tissues.

<sup>f</sup>Molecular subtypes were defined as luminal A: ER+ and/or PR+/HER2-; luminal B: ER+ and/or PR+/HER2+; HER2+; TNBC: ER-/PR-/HER2-.

<sup>g</sup>IDC: Invasive ductal carcinomas; ILC: Invasive lobular carcinomas; Others including micropapillary carcinomas, metaplastic carcinomas and mucinous adenocarcinomas.

<sup>h</sup>Patients were arbitrarily divided into two groups according to the median age of menarche age 15.

**Supplementary Table 4. The relationship between the presence of nerve trunks and clinicopathological parameters in breast cancer**

| Parameter                                 | Nerve trunk -<br>(n=31) | Nerve trunk +<br>(n=95) | <i>p</i> -value <sup>a</sup> |
|-------------------------------------------|-------------------------|-------------------------|------------------------------|
| <b>Tumor size<sup>b</sup></b>             |                         |                         | 0.9772                       |
| 1 (n=56)                                  | 13 (23.2%)              | 43 (76.8%)              |                              |
| 2 (n=61)                                  | 16 (26.2%)              | 45 (73.8%)              |                              |
| 3 (n=4)                                   | 1 (25.0%)               | 3 (75.0%)               |                              |
| 4 (n=5)                                   | 1 (20.0%)               | 4 (80.0%)               |                              |
| <b>Patient age<sup>c</sup></b>            |                         |                         | 0.1782                       |
| ≤50 (n=64)                                | 19 (29.7%)              | 45 (70.3%)              |                              |
| >50 (n=62)                                | 12 (19.4%)              | 50 (80.6%)              |                              |
| <b>Lymph node involvement<sup>d</sup></b> |                         |                         | 0.4032                       |
| 0 (n=71)                                  | 20 (28.2%)              | 51 (71.8%)              |                              |
| 1 (n=31)                                  | 8 (25.8%)               | 23 (74.2%)              |                              |
| 2 (n=10)                                  | 2 (20.0%)               | 8 (80.0%)               |                              |
| 3 (n=14)                                  | 1 (7.1%)                | 13 (92.9%)              |                              |
| <b>HER2<sup>e</sup></b>                   |                         |                         | 0.8575                       |
| HER2 - (n =91)                            | 22 (24.2%)              | 69 (75.8%)              |                              |
| HER2 + (n=35)                             | 9 (25.7%)               | 26 (74.3%)              |                              |
| <b>ER<sup>e</sup></b>                     |                         |                         | 0.0701                       |
| ER - (n =44)                              | 15 (34.1%)              | 29 (65.9%)              |                              |
| ER + (n =82)                              | 16 (19.5%)              | 66 (80.5%)              |                              |
| <b>PR<sup>e</sup></b>                     |                         |                         | 0.4115                       |
| PR - (n =57)                              | 16 (28.1%)              | 41 (71.9%)              |                              |
| PR + (n =69)                              | 15 (21.7%)              | 54 (78.3%)              |                              |
| <b>Molecular subtype<sup>f</sup></b>      |                         |                         | 0.4206                       |
| Luminal A (n =69)                         | 14 (20.3%)              | 55 (79.7%)              |                              |
| Luminal B (n =15)                         | 3 (20.0%)               | 12 (80.0%)              |                              |
| HER-2 positive (n =20)                    | 6 (30.0%)               | 14 (70.0%)              |                              |
| Triple negative (n =22)                   | 8 (36.4%)               | 14 (63.6%)              |                              |
| <b>Pathological subtype<sup>g</sup></b>   |                         |                         | 0.4174                       |
| IDC (n =116)                              | 27 (23.3%)              | 89 (76.7%)              |                              |
| ILC (n =6)                                | 2 (33.3%)               | 4 (66.7%)               |                              |
| Others (n=4)                              | 2 (50.0%)               | 2 (50.0%)               |                              |
| <b>Menopause</b>                          |                         |                         | <b>0.0368</b>                |
| Pre-menopause (n =69)                     | 22 (31.9%)              | 47 (68.1%)              |                              |
| Post-menopause (n =57)                    | 9 (15.9%)               | 48 (84.2%)              |                              |
| <b>The age of menarche<sup>h</sup></b>    |                         |                         | <b>0.0114</b>                |
| ≤15 (n =73)                               | 24 (32.9%)              | 49 (67.1%)              |                              |
| >15 (n =53)                               | 7 (13.2%)               | 46 (86.8%)              |                              |

<sup>a</sup>Chi-squared test, a *P* value ≤ 0.05 was considered statistically significant.

<sup>b</sup>Tumor sizes were scored according to the TNM staging system.

<sup>c</sup>Patients were arbitrarily divide into two groups according to the median age at diagnosis age 50.

<sup>d</sup>Lymph node involvement was scored according to the TNM staging system.

<sup>e</sup>HER2, ER and PR positivity defined using immunohistochemistry was recorded in the pathological report of surgically removed breast cancer tissues.

<sup>f</sup>Molecular subtypes were defined as luminal A: ER+ and/or PR+/HER2-; luminal B: ER+ and/or PR+/HER2+; HER2+; TNBC: ER-/PR-/HER2-.

<sup>g</sup>IDC: Invasive ductal carcinomas; ILC: Invasive lobular carcinomas; Others including micropapillary carcinomas, metaplastic carcinomas and mucinous adenocarcinomas.

<sup>h</sup>Patients were arbitrarily divided into two groups according to the median age of menarche age 15.

**Supplementary Table 5. The relationship between the density of nerve trunks and clinicopathological parameters in breast cancer (The median nerve trunk count as the cut-off)**

| Parameter                                 | Nerve trunk counts $\leq 3$<br>(n=66) | Nerve trunk counts $>3$ (n=60) | <i>p</i> -value <sup>a</sup> |
|-------------------------------------------|---------------------------------------|--------------------------------|------------------------------|
| <b>Tumor size<sup>b</sup></b>             |                                       |                                | 0.5290                       |
| 1 (n=56)                                  | 30 (53.6%)                            | 26 (46.4%)                     |                              |
| 2 (n=61)                                  | 33 (54.1%)                            | 28 (45.9%)                     |                              |
| 3 (n=4)                                   | 2 (50.0%)                             | 2 (50.0%)                      |                              |
| 4 (n=5)                                   | 1 (20.0%)                             | 4 (80.0%)                      |                              |
| <b>Patient age<sup>c</sup></b>            |                                       |                                | 0.3770                       |
| $\leq 50$ (n=64)                          | 36 (56.3%)                            | 28 (43.8%)                     |                              |
| $>50$ (n=62)                              | 30 (48.4%)                            | 32 (51.6%)                     |                              |
| <b>Lymph node involvement<sup>d</sup></b> |                                       |                                | 0.0687                       |
| 0 (n=71)                                  | 43 (60.6%)                            | 28 (39.4%)                     |                              |
| 1 (n=31)                                  | 16 (51.6%)                            | 15 (48.4%)                     |                              |
| 2 (n=10)                                  | 3 (30.0%)                             | 7 (70.0%)                      |                              |
| 3 (n=14)                                  | 4 (28.6%)                             | 10 (71.4%)                     |                              |
| <b>HER2<sup>e</sup></b>                   |                                       |                                | 0.8944                       |
| HER2 - (n =91)                            | 48 (52.7%)                            | 43 (47.3%)                     |                              |
| HER2 + (n=35)                             | 18 (51.4%)                            | 17 (48.6%)                     |                              |
| <b>ER<sup>e</sup></b>                     |                                       |                                | 0.9858                       |
| ER - (n =44)                              | 23 (52.3%)                            | 21 (47.7%)                     |                              |
| ER + (n =82)                              | 43 (52.4%)                            | 39 (47.6%)                     |                              |
| <b>PR<sup>e</sup></b>                     |                                       |                                | 0.5057                       |
| PR - (n =57)                              | 28 (49.1%)                            | 29 (50.9%)                     |                              |
| PR + (n =69)                              | 38 (55.1%)                            | 31 (44.9%)                     |                              |
| <b>Molecular subtype<sup>f</sup></b>      |                                       |                                | 0.2792                       |
| Luminal A (n =69)                         | 34 (49.3%)                            | 35 (50.7%)                     |                              |
| Luminal B (n =15)                         | 10 (66.7%)                            | 5 (33.3%)                      |                              |
| HER-2 positive (n =20)                    | 8 (40.0%)                             | 12 (60.0%)                     |                              |
| Triple negative (n =22)                   | 14 (63.6%)                            | 8 (36.4%)                      |                              |
| <b>Pathological subtype<sup>g</sup></b>   |                                       |                                | 0.1039                       |
| IDC (n =116)                              | 60 (51.7%)                            | 56 (48.3%)                     |                              |
| ILC (n =6)                                | 2 (33.3%)                             | 4 (66.7%)                      |                              |
| Others (n=4)                              | 4 (100.0%)                            | 0 (0.0%)                       |                              |
| <b>Menstruation</b>                       |                                       |                                | 0.5057                       |
| Pre-menopause (n =69)                     | 38 (55.1%)                            | 31 (44.9%)                     |                              |
| Post-menopause (n =57)                    | 28 (49.1%)                            | 29 (50.9%)                     |                              |
| <b>Age of menarche<sup>h</sup></b>        |                                       |                                | 0.3183                       |
| $\leq 15$ (n =73)                         | 41 (56.2%)                            | 32 (43.8%)                     |                              |
| $>15$ (n =53)                             | 25 (47.2%)                            | 28 (52.8%)                     |                              |

<sup>a</sup>Chi-squared test, a *P* value  $\leq 0.05$  was considered statistically significant.

<sup>b</sup>Tumor sizes were scored according to the TNM staging system.

<sup>c</sup>Patients were arbitrarily divide into two groups according to the median age at diagnosis age 50.

<sup>d</sup>Lymph node involvement was scored according to the TNM staging system.

<sup>e</sup>HER2, ER and PR positivity defined using immunohistochemistry was recorded in the pathological report of surgically removed breast cancer tissues.

<sup>f</sup>Molecular subtypes were defined as luminal A: ER+ and/or PR+/HER2-; luminal B: ER+ and/or PR+/HER2+; HER2+; TNBC: ER-/PR-/HER2-.

<sup>g</sup>IDC: Invasive ductal carcinomas; ILC: Invasive lobular carcinomas; Others including micropapillary carcinomas, metaplastic carcinomas and mucinous adenocarcinomas.

<sup>h</sup>Patients were arbitrarily divided into two groups according to the median age of menarche age 15.

**Supplementary Table 6. The relationship between the density of nerve trunks and clinic-pathological parameters in breast cancer (The high quartile of nerve trunk count as the cut off)**

| Parameter                                 | Low nerve trunk counts (n=99) | High nerve trunk counts (n=27) | <i>p</i> -value <sup>a</sup> |
|-------------------------------------------|-------------------------------|--------------------------------|------------------------------|
| <b>Tumor size<sup>b</sup></b>             |                               |                                | 0.6643                       |
| 1 (n=56)                                  | 43 (76.8%)                    | 13 (23.2%)                     |                              |
| 2 (n=61)                                  | 50 (82.0%)                    | 11 (18.0%)                     |                              |
| 3 (n=4)                                   | 3 (75.0%)                     | 1 (25.0%)                      |                              |
| 4 (n=5)                                   | 3 (60.0%)                     | 2 (40.0%)                      |                              |
| <b>Patient age<sup>c</sup></b>            |                               |                                | 0.7564                       |
| ≤50 (n=64)                                | 51 (79.7%)                    | 13 (20.3%)                     |                              |
| >50 (n=62)                                | 48 (77.4%)                    | 14 (22.6%)                     |                              |
| <b>Lymph node involvement<sup>d</sup></b> |                               |                                | 0.2290                       |
| 0 (n=71)                                  | 58 (81.7%)                    | 13 (18.3%)                     |                              |
| 1 (n=31)                                  | 25 (80.6%)                    | 6 (19.4%)                      |                              |
| 2 (n=10)                                  | 8 (80.0%)                     | 2 (20.0%)                      |                              |
| 3 (n=14)                                  | 8 (57.1%)                     | 6 (42.9%)                      |                              |
| <b>HER2<sup>e</sup></b>                   |                               |                                | 0.8085                       |
| HER2 - (n =91)                            | 72 (79.1%)                    | 19 (20.9%)                     |                              |
| HER2 + (n=35)                             | 27 (77.1%)                    | 8 (22.9%)                      |                              |
| <b>ER<sup>e</sup></b>                     |                               |                                | 0.2687                       |
| ER - (n =44)                              | 37 (84.1%)                    | 7 (15.9%)                      |                              |
| ER + (n =82)                              | 62 (75.6%)                    | 20 (24.4%)                     |                              |
| <b>PR<sup>e</sup></b>                     |                               |                                | 0.9255                       |
| PR - (n =57)                              | 45 (78.9%)                    | 12 (21.1%)                     |                              |
| PR + (n =69)                              | 54 (78.3%)                    | 15 (21.7%)                     |                              |
| <b>Molecular subtype<sup>f</sup></b>      |                               |                                | 0.1884                       |
| Luminal A (n =69)                         | 51 (73.9%)                    | 18 (26.1%)                     |                              |
| Luminal B (n =15)                         | 12 (80.0%)                    | 3 (20.0%)                      |                              |
| HER-2 positive (n =20)                    | 15 (75.0%)                    | 5 (25.0%)                      |                              |
| Triple negative (n =22)                   | 21 (95.5%)                    | 1 (4.5%)                       |                              |
| <b>Pathological subtype<sup>g</sup></b>   |                               |                                | 0.4500                       |
| IDC (n =116)                              | 91 (78.4%)                    | 25 (21.6%)                     |                              |
| ILC (n =6)                                | 4 (66.7%)                     | 2 (33.3%)                      |                              |
| Others (n=4)                              | 4 (100.0%)                    | 0 (0.0%)                       |                              |
| <b>Menopause</b>                          |                               |                                | 0.7318                       |
| Pre-menopause (n =69)                     | 55 (79.7%)                    | 14 (20.3%)                     |                              |
| Post-menopause (n =57)                    | 44 (77.2%)                    | 13 (22.8%)                     |                              |
| <b>The age of menarche<sup>h</sup></b>    |                               |                                | 0.4700                       |
| ≤15 (n =73)                               | 59 (80.8%)                    | 14 (19.2%)                     |                              |
| >15 (n =53)                               | 40 (75.5%)                    | 13 (24.5%)                     |                              |

<sup>a</sup>Chi-squared test, a *P* value ≤ 0.05 was considered statistically significant.

<sup>b</sup>Tumor sizes were scored according to the TNM staging system.

<sup>c</sup>Patients were arbitrarily divide into two groups according to the median age at diagnosis age 50.

<sup>d</sup>Lymph node involvement was scored according to the TNM staging system.

<sup>e</sup>HER2, ER and PR positivity defined using immunohistochemistry was recorded in the pathological report of surgically removed breast cancer tissues.

<sup>f</sup>Molecular subtypes were defined as luminal A: ER+ and/or PR+/HER2-; luminal B: ER+ and/or PR+/HER2+; HER2+; TNBC: ER-/PR-/HER2-.

<sup>g</sup>IDC: Invasive ductal carcinomas; ILC: Invasive lobular carcinomas; Others including micropapillary carcinomas, metaplastic carcinomas and mucinous adenocarcinomas.

<sup>h</sup>Patients were arbitrarily divided into two groups according to the median age of menarche age 15.
